# Supplementary material
Source: Springer Nature journal article supplement (https://www.springermedizin.de/resource/supplementary/12872_2006_138_MOESM1_ESM.pdf/9431100)

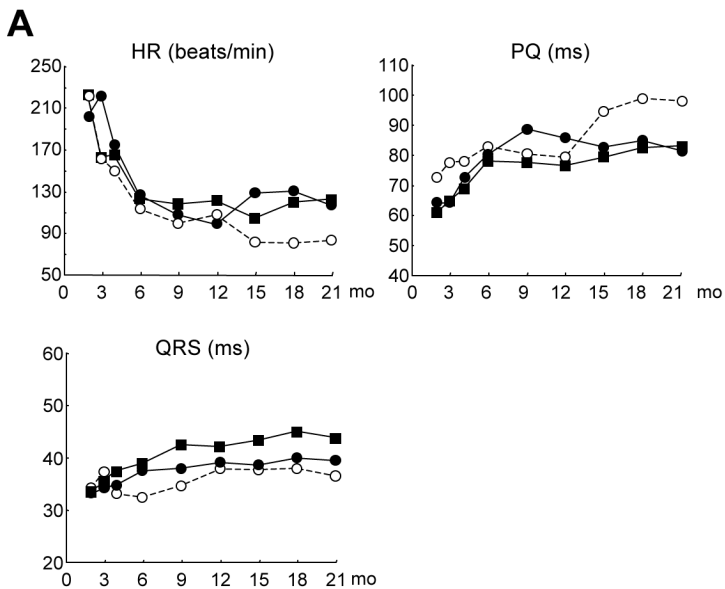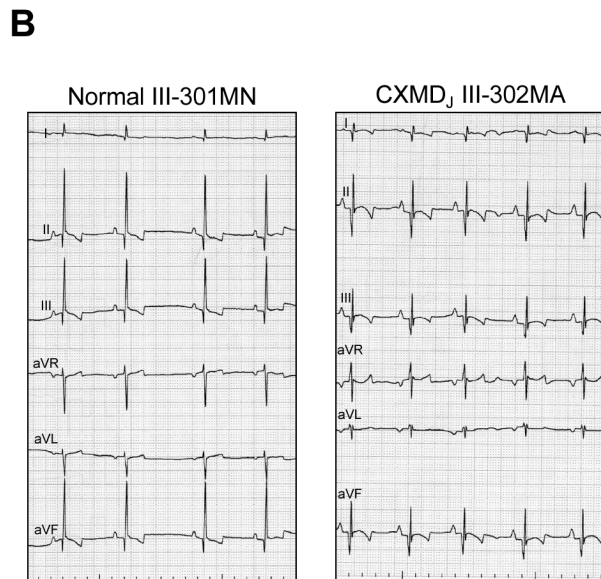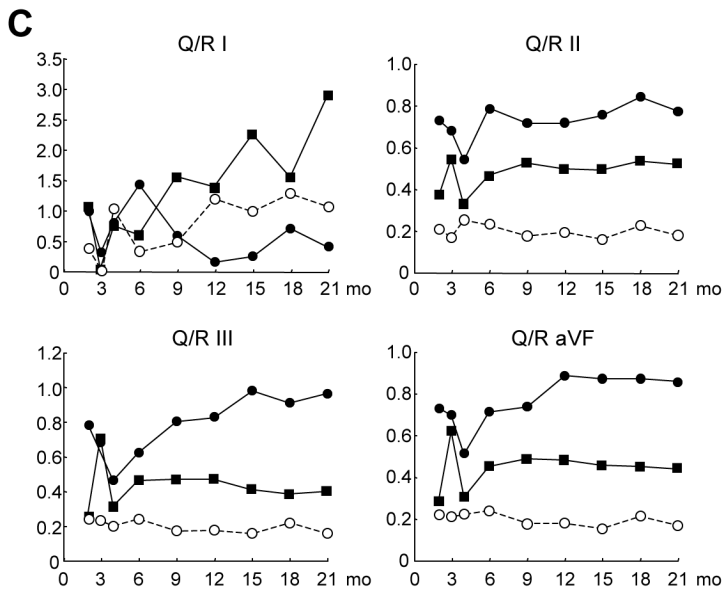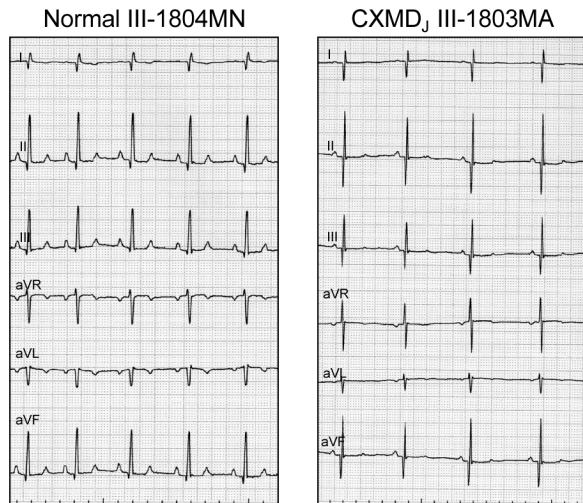

Supplement: MOESM1 [file 9431100]
